# Supplementary material
Source: PubMed Central journal article supplement (PMC3650678)
Supplement: NIHMS460554-supplement-Supplemental_Info.pdf [file NIHMS460554-supplement-Supplemental_Info.pdf]

Supporting Information for:

## Syntheses of C33-, C35-, and C39-Peridinin and their Spectral Characteristics

Takayuki Kajikawa,<sup>a</sup> Shinji Hasegawa,<sup>a</sup> Takashi Iwashita,<sup>b</sup> Toshiyuki Kusumoto,<sup>c</sup>  
Hideki Hashimoto,<sup>c</sup> Dariusz M. Niedzwiedzki,<sup>d</sup> Harry A. Frank,<sup>d</sup> and Shigeo  
Katsumura<sup>a\*</sup>

<sup>a</sup>*School of Science and Technology, Kwansai Gakuin University, Gakuen 2-1, Sanda, Hyogo  
669-1337* <sup>b</sup>*Suntory Institute For Bioorganic Research, Wakayamadai 1-1-1, Shimamoto,  
Mishimagunn, Osaka 618-8503* <sup>c</sup>*Department of Physics and CREST/JST, Graduate School of  
Science, Osaka City University, 3-3-138 Sugimoto, Sumiyoshi-ku, Osaka 558-8585, Japan, and*  
<sup>d</sup>*Department of Chemistry, University of Connecticut, Storrs, CT, 06269-3060, USA*

E-mail: katsumura@kwansai.ac.jp

### General

All commercially available reagents were used without further purification. Tetrahydrofuran (THF) was refluxed over and distilled from sodium-benzophenone ketyl. Preparative separation was performed by column chromatography on silica gel. <sup>1</sup>H NMR and <sup>13</sup>C NMR spectra were recorded on a 400MHz and 750 MHz spectrometer and chemical shifts were represented as δ-values relative to the internal standard TMS. IR spectra were recorded on a FT-IR Spectrometer. High-resolution mass spectra (HRMS) were measured on a ESI-TOF MS.

### Experimental

**(1Z,3E)-6-(1'R,2'R,4S')-4'-Acetoxy-2'-hydroxy-2',6',6'-trimethylcyclohexylidene]-1-iodo-1,4-dimethylhexa-1,3,5-triene 5.** To a suspension of ethylphosphonium bromide (651 mg, 2.24 mmol) in THF (7.04 mL) was added sodium bis(trimethylsilyl)amide (1.0M in THF, 4.47 mL, 4.47 mmol) at 0 °C. The mixture was stirred for 15 min at the same temperature, and then to the resulting mixture was added N-iodosuccinimide (502 mg, 2.24 mmol) at 0 °C. After the reaction mixture was stirred for 30 min, aldehyde **11** (237 mg, 0.75 mmol) was added at the same temperature, and then the mixture was stirred for 15 min at the same temperature. The resulting mixture was poured into water, and extracted with ethyl

acetate. The organic layers were combined, washed with brine, dried over  $\text{MgSO}_4$ , filtered and concentrated *in vacuo*. Purification by silica gel column chromatography (from 10% to 50% ethyl acetate in hexane) afforded vinyl iodide **5** (237 mg, 70%) as a yellow solid:  $[\alpha]_D^{23}$  -16.4 (c 0.96,  $\text{CHCl}_3$ ); IR (KBr disk,  $\text{cm}^{-1}$ ) 3462, 2961, 2982, 2872, 2858, 1932, 1728, 1585, 1458, 1375, 1250, 1184, 1163, 1124, 1072, 1032, 972, 883, 856, 742;  $^1\text{H}$  NMR ( $\text{CDCl}_3$ , 400 MHz)  $\delta$  6.30 (dd,  $J=10.3$ , 1.4 Hz, 1H), 6.07 (s, 1H), 6.01 (d,  $J=10.3$  Hz, 1H), 5.38 (m, 1H), 2.65 (s, 3H), 2.28 (ddd,  $J=12.8$ , 4.4, 2.1 Hz, 1H), 2.03 (s, 1H), 1.99 (ddd,  $J=12.4$ , 4.1, 2.3 Hz, 1H), 1.78 (s, 3H), 1.50 (dd,  $J=12.6$ , 11.5 Hz, 1H), 1.40(m, 1H), 1.38 (s, 3H), 1.35 (s, 3H), 1.07 (s, 3H);  $^{13}\text{C}$  NMR ( $\text{CDCl}_3$ , 100 MHz)  $\delta$  202.6, 170.7, 134.6, 130.8, 129.7, 118.0, 103.2, 103.1, 73.0, 68.3, 45.8, 45.6, 36.0, 34.7, 32.4, 31.6, 29.5, 21.8, 15.4; ESI-HRMS  $m/z$  Calcd for  $\text{C}_{19}\text{H}_{27}\text{IO}_3$  ( $\text{M}+\text{Na}$ ) $^+$  453.0903, found 453.0892.

**C33-peridinin 2.** To a solution of iodide **5** (58 mg, 0.14 mmol) and alkyne **6** (43 mg, 0.14 mmol) in triethylamine (1.36 mL) was added tetrakis(triphenylphosphine)palladium (16 mg, 0.014 mmol) and cuprous iodide (8 mg, 0.042 mmol). After the reaction mixture was stirred for 10 min at 45 °C, formic acid (0.015 mL, 0.41 mmol) was added at the same temperature, and then the resulting mixture was stirred for 10 min at the same temperature. The mixture was poured into a saturated aqueous  $\text{NH}_4\text{Cl}$  solution, and then extracted with ethyl acetate. The organic layers were combined, washed with brine, dried over  $\text{MgSO}_4$ , filtered and concentrated *in vacuo*. Purification by silica gel column chromatography (from 30% to 75% ethyl acetate in hexane) in the dark afforded C33-peridinin **2** (29 mg, 35%) as a mixture of the isomers in a red film. A solution of the obtained mixture containing *all trans*-C33-peridinin **2** and its *cis*-isomer in benzene was left at room temperature under irradiation with fluorescence light. After 2 days, the separation by preparative HPLC [column: Develosil CN-UG (0.6 x 25 cm); mobile phase: acetone / *n*-hexane = 1 / 10; flow rate: 2.0 mL / min.; UVdetect: 430 nm; retention time: (all-*trans*-isomer) 80 min, (11Z, 11'-Z-isomer) 82 min, (11E, 11'-E-isomer) 85 min.] in the dark afforded the desired optically active C33-peridinin **2** as a red film:  $[\alpha]_D^{23}$  -93.9 (c 0.98,  $\text{CHCl}_3$ ); IR (KBr disk,  $\text{cm}^{-1}$ ) 3449, 2961, 2926, 2855, 1925, 1751, 1748, 1736, 1655, 1637, 1560, 1458, 1377, 1303, 1261, 1250, 1165, 1030;  $^1\text{H}$  NMR ( $\text{CDCl}_3$ , 400 MHz)  $\delta$  7.17 (d,  $J=15.6$  Hz, 1H), 7.02 (s, 1H), 6.65 (d,  $J=12.1$  Hz, 1H), 6.38 (d,  $J=6.3$  Hz, 1H), 6.37 (d,  $J=15.6$  Hz, 1H), 6.12 (s, 1H), 5.78 (s, 1H), 5.72 (s, 1H), 5.38 (m, 1H), 3.90 (m, 1H), 2.40 (ddd,  $J=14.2$ , 5.0, 1.6 Hz, 1H), 2.29 (m, 1H), 2.23 (s, 3H), 2.04 (s, 3H), 2.00 (m, 1H), 1.84 (s, 3H), 1.65 (m, 2H), 1.51 (m, 1H), 1.42 (m, 1H), 1.39 (s, 3H), 1.35 (s, 3H), 1.29 (m, 1H), 1.21 (s, 3H), 1.20 (s, 3H), 1.07 (s, 3H), 0.97 (s, 3H);  $^{13}\text{C}$  NMR ( $\text{CDCl}_3$ , 100 MHz)  $\delta$  203.0, 170.3, 168.7, 146.5, 136.4, 136.3, 133.6, 133.6, 133.4, 124.7, 124.1, 121.7, 119.6, 117.7, 103.7, 72.6, 70.4, 67.9, 67.5, 64.2, 47.1, 45.4, 45.2, 40.9, 35.9, 35.3, 32.0, 31.2, 29.5, 29.1, 24.9, 21.4, 19.9, 15.2, 14.1; ESI-HRMS  $m/z$  Calcd for  $\text{C}_{35}\text{H}_{46}\text{O}_7$  ( $\text{M}+\text{Na}$ ) $^+$  601.3141, found 601.3160.

**C35-peridinin 3.** To a solution of sulfone **7** (43 mg, 0.090 mmol) and aldehyde **8** (31 mg, 0.090 mmol)

in THF (1.35 mL) was added dropwise sodium bis(trimethylsilyl)amide (1.0M in THF, 0.27 mL, 0.27 mmol) at -78 °C in the dark. After being stirred for 5 min at the same temperature, the reaction mixture was poured into water, and then extracted with ethyl acetate and THF (1:1). The organic layers were combined, washed with brine, dried over MgSO<sub>4</sub>, filtered and concentrated *in vacuo*. Purification by short silica gel column chromatography (from 15% to 30% acetone in hexane) in the dark afforded the C35-peridinin **3** (21 mg, 39%) as a mixture of the isomers in a red film. A solution of a mixture of the *all trans*-C35-peridinin **3** and its *cis*-isomer in benzene was left at room temperature under the irradiation with fluorescence light. After 2 days, the separation by preparative HPLC [column: Develosil CN-UG (0.6 x 25 cm); mobile phase: acetone / *n*-hexane = 1 / 8; flow rate: 1.5 mL / min.; UVdetect: 430 nm; retention time: (*all trans*-isomer) 66 min, (11Z-isomer) 69 min.] in the dark afforded the desired optically active C35-peridinin **3** as a red film: IR (KBr disk, cm<sup>-1</sup>) 3449, 2914, 2855, 1736, 1464, 1377, 1261, 1161, 1095, 1034, 966, 860, 802; <sup>1</sup>H NMR (CDCl<sub>3</sub>, 400 MHz) δ 7.14 (d, *J*=15.6 Hz, 1H), 7.02 (s, 1H), 6.69 (dd, *J*=13.7, 11.4 Hz, 1H), 6.59 (d, *J*=14.0, 11.2 Hz, 1H), 6.37 (d, *J*=15.6 Hz 1H), 6.17 (d, *J*=11.2 Hz 1H), 6.06 (s, 1H), 5.72 (s, 1H), 5.38 (m, 1H), 3.91 (m, 1H), 2.40 (ddd, *J*=14.2, 4.8, 1.4 Hz, 1H), 2.28 (m, 1H), 2.22 (s, 3H), 2.04 (s, 3H), 2.00 (m, 1H), 1.82 (s, 3H), 1.64 (m, 2H), 1.51 (m, 1H), 1.39 (s, 3H), 1.35 (s, 3H), 1.36 (m, 2H), 1.21 (s, 3H), 1.20 (s, 3H), 1.07 (s, 3H), 0.98 (s, 3H); <sup>13</sup>C NMR (CDCl<sub>3</sub>, 100 MHz) δ 202.7, 170.3, 168.7, 146.7, 138.1, 136.3, 134.6, 133.6, 133.0, 128.8, 128.3, 124.7, 121.7, 119.2, 117.6, 103.3, 72.6, 70.4, 67.9, 67.5, 64.2, 47.1, 45.4, 45.2, 40.9, 35.8, 35.3, 32.0, 31.3, 29.7, 29.5, 29.2, 24.9, 21.4, 19.9, 15.5, 14.1; ESI-HRMS *m/z* Calcd for C<sub>37</sub>H<sub>48</sub>O<sub>7</sub> (M+Na)<sup>+</sup> 627.3298, found 627.3282.

**(5Z)-[(2'E,4'E)-6'-Hydroxy-2'-methyl-1'-hexanylidene]-3-[(1'E)-2'-(1''S,2''R,4''S)-4''hydroxy-1''',2'''-epoxy-2''',6''',6'''-trimethylcyclohex-1'''-ylethene-1''-yl]-2(5H)-furanone **13**.** To a solution of the alkyne **6** (48 mg, 0.16 mmol) and iodide **12** (80 mg, 0.24 mmol) in triethylamine (1.60 mL) was added tris(dibenzylideneacetone)dipalladium (15 mg, 0.016 mmol), tri(2-furyl)phosphine (15 mg, 0.064 mmol) and cuprous iodide (9 mg, 0.048 mmol). After the reaction mixture was stirred for 10 min at 45 °C, formic acid (0.18 ml 4.74 mmol) was added at the same temperature, and then the mixture was stirred for 10 min at the same temperature. The resulting mixture was poured into a saturated aqueous NH<sub>4</sub>Cl solution, and extracted with ethyl acetate. The organic layers were combined, washed with brine, dried over MgSO<sub>4</sub>, filtered and concentrated *in vacuo*. Purification by silica gel column chromatography (from 50% to 75% ethyl acetate in hexane) afforded alcohol **13** (24 mg, 44%) as a yellow solid: [α]<sub>D</sub><sup>23</sup> -116.5 (c 0.98, CHCl<sub>3</sub>); IR (KBr disk, cm<sup>-1</sup>) 3422, 2961, 2928, 2870, 1749, 1458, 1601, 1554, 1458, 1381, 1363, 1184, 1149, 1049, 943, 767, 653; <sup>1</sup>H NMR (CDCl<sub>3</sub>, 400 MHz) δ 7.18 (d, *J*=15.6 Hz, 1H), 7.03 (s, 1H), 6.67 (ddt, *J*=15.1, 11.4, 1.8 Hz, 1H), 6.38 (dd, *J*=9.61 Hz, 1H), 6.37 (d, *J*=15.6 Hz, 1H), 6.04 (dt, *J*=15.1, 5.5 Hz, 1H), 5.69 (s, 1H), 4.30 (d, *J*=5.03 Hz, 2H), 3.91 (m, 1H), 2.40 (ddd, *J*=14.6, 5.0, 1.8 Hz 1H), 2.21 (s, 3H), 2.21 (s, 3H), 1.65 (m, 2H), 1.27 (m, 1H), 2.21 (s, 6H), 0.98 (s, 3H); <sup>13</sup>C NMR (CDCl<sub>3</sub>, 100

MHz)  $\delta$  169.0, 147.1, 137.0, 136.6, 134.3, 134.1, 132.4, 127.3, 125.6, 121.9, 119.1, 70.8, 67.9, 64.5, 63.7, 47.4, 41.2, 35.6, 29.8, 25.2, 20.2, 15.7; ESI-HRMS  $m/z$  Calcd for  $C_{22}H_{28}O_5$  (M+Na)<sup>+</sup> 395.1834, found 395.1848.

**C39-peridinin 4.** To a solution of sulfone **9** (56 mg, 0.11 mmol) and aldehyde **10** (39 mg, 0.11 mmol) in THF (1.68 mL) was added dropwise sodium bis(trimethylsilyl)amide (1.0M in THF, 0.11 mL, 0.11 mmol) at -78 °C in the dark. After being stirred for 5 min at the same temperature, the reaction mixture was poured into water, and then extracted with ethyl acetate and THF (1:1). The organic layers were combined, washed with brine, dried over  $MgSO_4$ , filtered and concentrated *in vacuo*. Purification by short silica gel column chromatography (from 10% to 20% acetone in hexane) in the dark afforded C39-peridinin **4** (25 mg, 35%) as a mixture of the isomers in a red film. A solution of the obtained mixture containing *all trans*-C39-peridinin **4** and its *cis*-isomer in benzene was left at room temperature under the irradiation with fluorescence light. After 2 days, the partial separation by preparative HPLC [column: Develosil CN-UG (0.6 x 25 cm); mobile phase: acetone / *n*-hexane = 1 / 10; flow rate: 2.0 mL / min.; UVdetect: 469 nm; retention time: (*all-trans*-isomer) 80 min, (9Z,13E-isomer) 89 min.] in the dark gave crude C39-peridinin **4**, which was further purified by preparative HPLC [column: YMC Carotenoid C30 (1.0 x 25 cm); reverse phase: acetonitrile / methanol / water = 87 / 10 / 3; flow rate: 2.5 mL / min.; UVdetect: 469 nm; retention time: (*all trans*-isomer) 118 min.] in the dark afforded the desired optically active C39-peridinin **4** as a red film: IR (KBr disk,  $cm^{-1}$ ) 3422, 2928, 2851, 1741, 1664, 1464, 1377, 1261, 1093, 1206, 800; <sup>1</sup>H NMR ( $CDCl_3$ , 750 MHz)  $\delta$  7.17 (d,  $J=15.5$  Hz, 1H), 7.02 (s, 1H), 6.61 (dd,  $J=13.4$ , 13.1 Hz, 1H), 6.57 (dd,  $J=15.1$ , 12.0 Hz, 1H), 6.48 (dd,  $J=13.7$ , 11.3 Hz, 1H), 6.46 (d,  $J=11.7$  Hz, 1H), 6.45 (dd,  $J=14.8$ , 11.7 Hz, 1H), 6.39 (dd,  $J=14.4$ , 11.0 Hz, 1H), 6.38 (d,  $J=15.5$  Hz, 1H), 6.10 (d,  $J=11.7$  Hz, 1H), 5.73 (s, 1H), 5.38 (m, 1H), 3.91 (m, 1H), 2.40 (dd,  $J=14.4$ , 4.8 Hz, 1H), 2.28 (m, 1H), 2.23 (s, 3H), 2.04 (s, 3H), 2.01 (m, 1H), 1.79 (s, 3H), 1.64 (m, 2H), 1.50 (m, 1H), 1.41 (m, 1H), 1.38 (s, 3H), 1.35 (s, 3H), 1.30 (m, 1H), 1.21 (s, 3H), 1.20 (s, 3H), 1.07 (s, 3H), 0.98 (s, 3H); <sup>13</sup>C NMR ( $CDCl_3$ , 188MHz)  $\delta$  202.6, 170.4, 168.8, 146.8, 138.0, 137.0, 136.3, 135.6, 134.1, 133.7, 133.4, 133.1, 132.9, 130.9, 129.2, 128.2, 124.8, 121.8, 119.2, 117.6, 103.3, 72.7, 70.5, 68.0, 67.5, 64.2, 47.1, 45.4, 45.2, 41.0, 35.8, 35.3, 32.1, 31.3, 29.5, 29.2, 24.9, 21.4, 19.9, 15.4, 14.0; ESI-HRMS  $m/z$  Calcd for  $C_{41}H_{52}O_7$  (M+Na)<sup>+</sup> 679.3611, found 679.3585.

```

File name      = icidide methyl C33 for
Author        = delta
Experiment    = single_pulse.ex2
Sample id     = 1
Solvent       = CHLOROFORM-D
Creation_time = 9-JAN-2009 11:06:19
Revision_time = 24-AUG-2009 11:07:43
Current_time  = 24-AUG-2009 11:14:53

Comment       = single_pulse
Data format   = ID COMPLEX
Dim_size      = 26214
Dim_title     = 1H
Dim_units     = [ppm]
Dimensions    = X
Site          = ECX400M
Spectrometer  = DELTA2_NMR

Field_strength = 9.389766[T] (400[MHz])
X_acq_duration = 4.36731904[s]
X_domain       = 1H
X_freq         = 399.78219838[MHz]
X_offset       = 4[ppm]
X_points       = 32768
X_prescans     = 1
X_resolution   = 0.22897343[Hz]
X_sweep        = 7.5030012[KHz]
X_domain       = 1H
Irr_domain     = 399.78219838[MHz]
Irr_freq       = 5[ppm]
Irr_offset     = 1H
Tri_domain     = 399.78219838[MHz]
Tri_freq       = 5[ppm]
Tri_offset     = FALSE
Mod return     = 1
Scans          = 8
Total_scans    = 8

X_90_width     = 10.5[us]
X_acq_time     = 4.36731904[s]
X_angle        = 45[deg]
X_atn          = 1.4[dB]
X_pulse        = 5.25[us]
Irr_mode       = Off
Tri_mode       = Off
Dante_preset   = FALSE
Initial_wait   = 1[s]
Recvr_gain     = 36
Relaxation_delay = 5[s]
Repetition_time = 9.36731904[s]
Temp_get       = 23.8[dc]

```

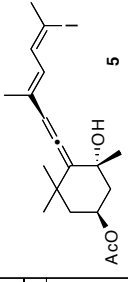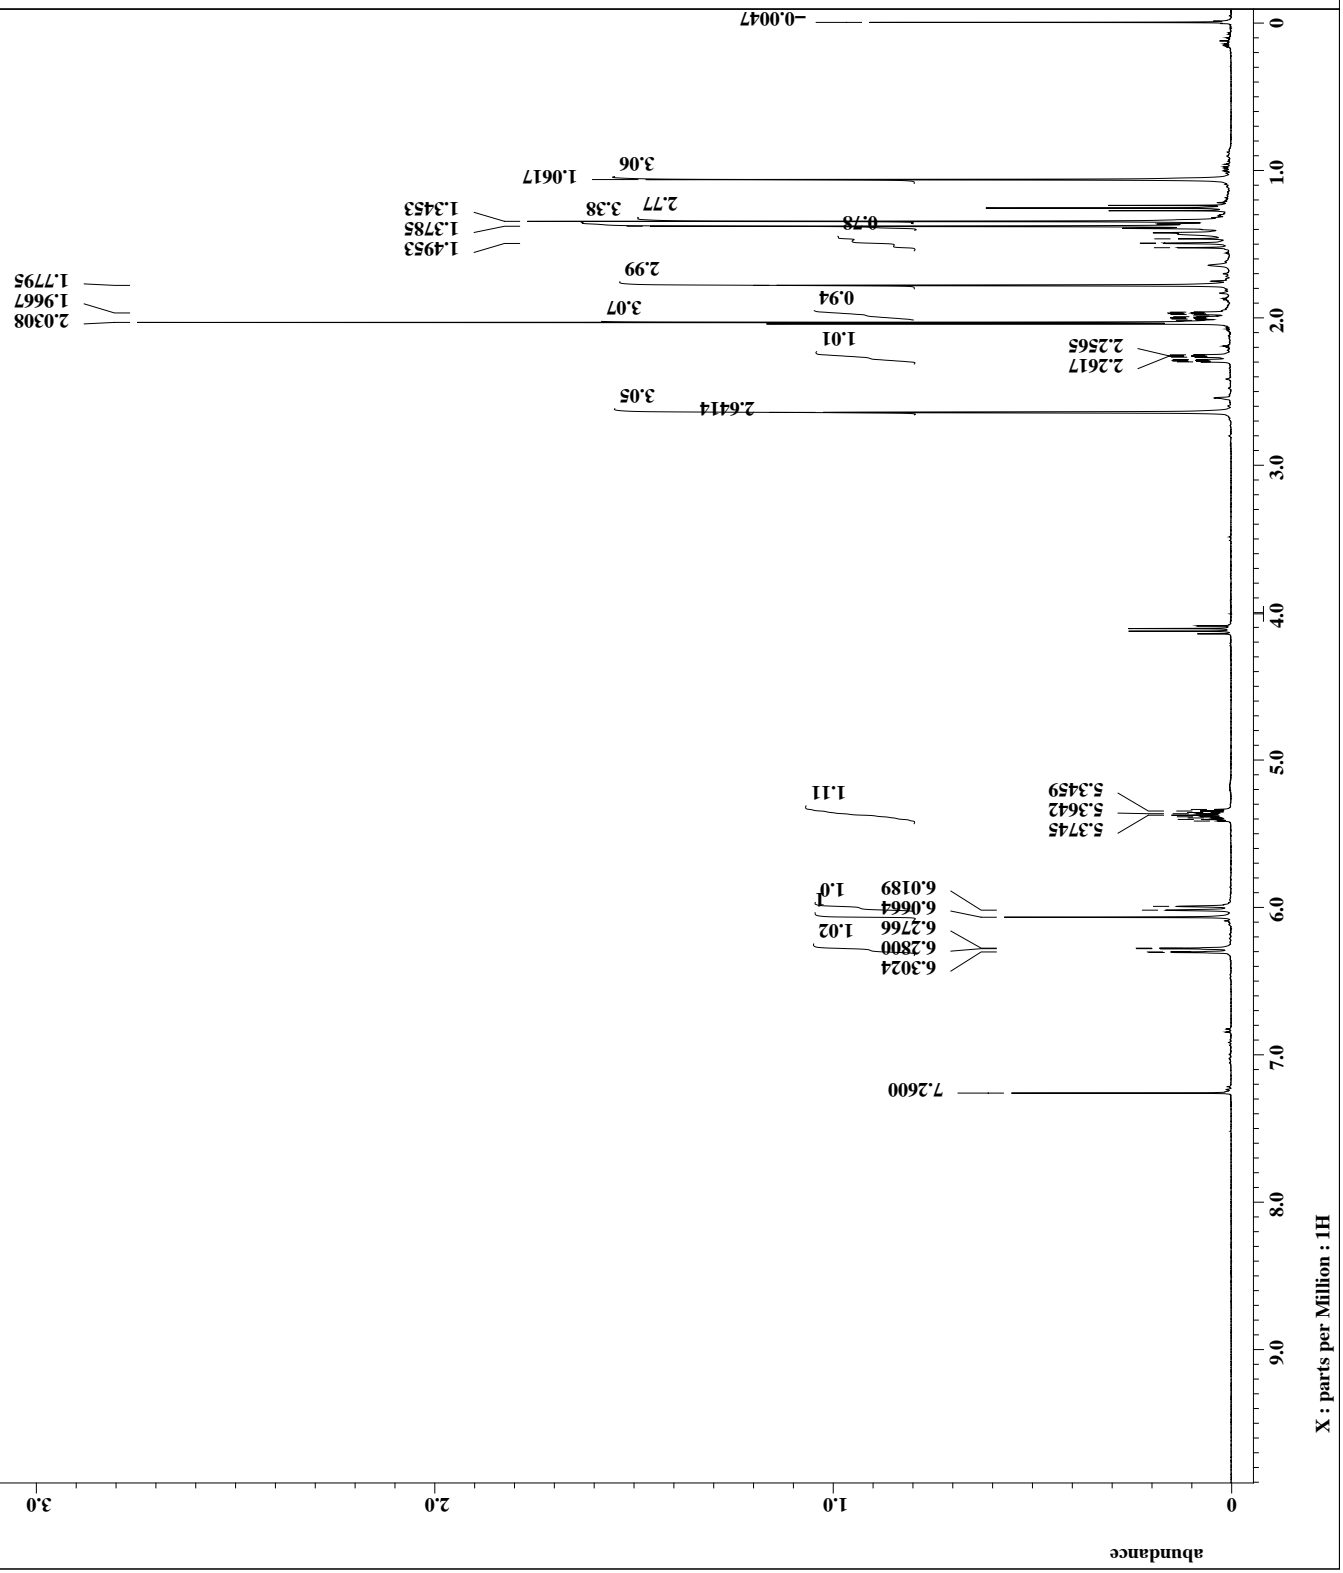

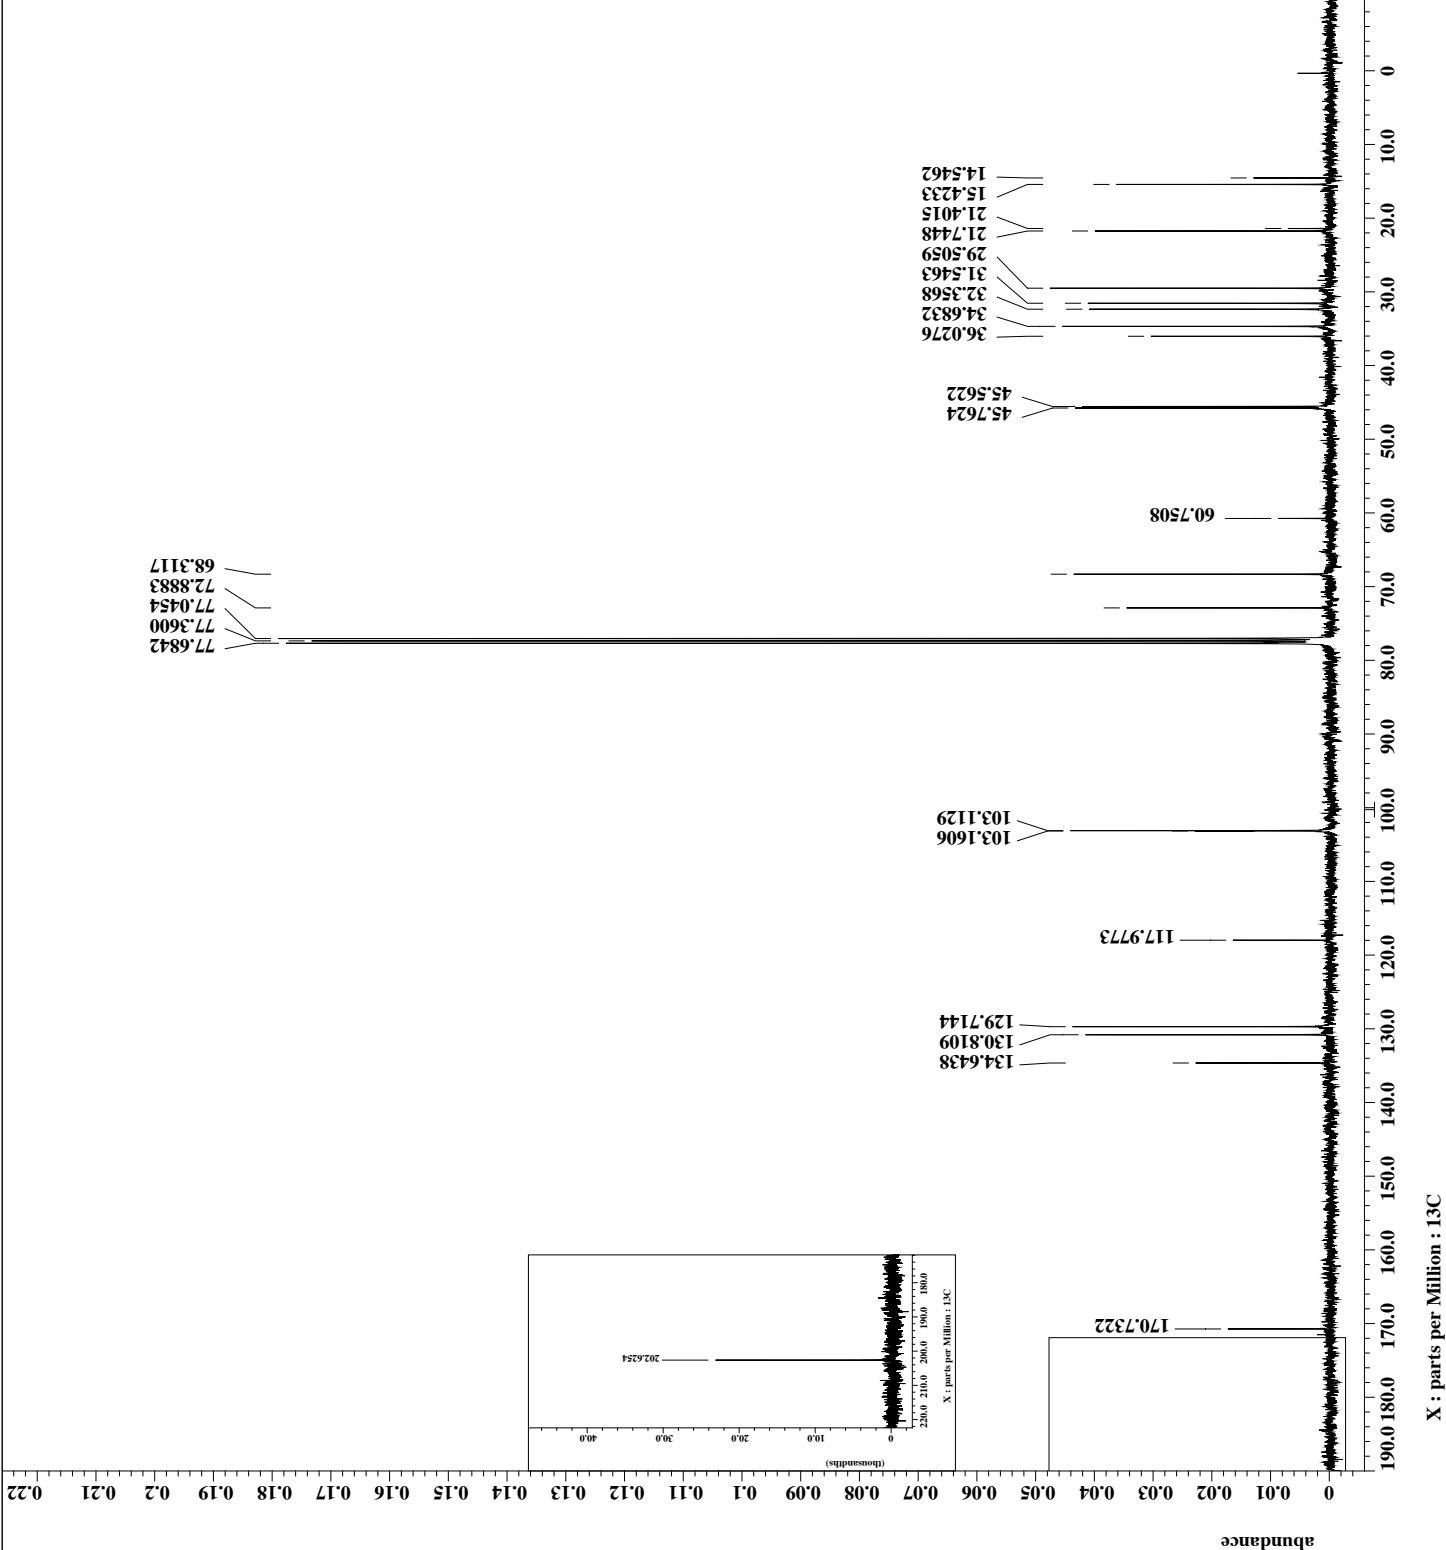

```

File name      = icidide methyl 13C for
Author         = delta
Experiment     = single_pulse_dec
Sample ID      = S#402267
Solvent        = CHLOROFORM-D
Creation time   = 9-JAN-2009 12:05:58
Revision time  = 24-AUG-2009 10:57:43
Current time   = 24-AUG-2009 10:59:21

Comment       = single pulse decouple
Data format   = ID COMPLEX
Dim Size      = 26214
Dim Title     = 13C
Dim Units     = [ppm]
Dimensions    = X
Site          = ECX400M
Spectrometer  = DELTA2_NMR

Field strength = 9.389766[T] (400[MHz])
X_acq_duration = 1.04333312[s]
X_domain       = 13C
X_freq         = 100.52530333[MHz]
X_offset       = 100[ppm]
X_points       = 32768
X_prescans     = 4
X_resolution   = 0.95846665[Hz]
X_sweep        = 31.40703518[kHz]
X_domain       = 1H
Irr_freq       = 399.78219838[MHz]
Irr_offset     = 5[ppm]
Clipped        = FALSE
Mod_return     = 1
Scans          = 1120
Total_scans    = 1120

X_90_width     = 8.4[us]
X_acq_time     = 1.04333312[s]
X_angle        = 45[deg]
X_atn          = 6.6[db]
X_pulse        = 4.2[us]
Irr_atn_dec    = 22.2[db]
Irr_atn_noe    = 22.2[db]
Irr_noise      = WAITZ
Decoupling     = TRUE
Initial_wait   = 1[s]
Noe            = TRUE
Noe_time       = 2[s]
Recvr_gain     = 50
Relaxation_delay = 2[s]
Repetition_time = 3.04333312[s]
Temp_get       = 24.4[dc]

```

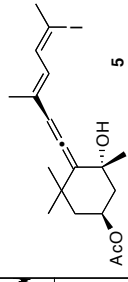



```

File name      = C33-peridinin derivat
Author        = delta
Experiment    = single_pulse_dec
Sample id     = 1
Solvent       = CHLOROFORM-D
Creation time  = 11-DEC-2008 23:01:59
Revision time = 24-AUG-2009 11:42:04
Current time  = 24-AUG-2009 11:43:05

Comment       = single pulse decouple
Data format   = ID COMPLEX
Dim size      = 26214
Dim title     = 13C
Dim units     = [ppm]
Dimensions    = X
Site          = ECX400M
Spectrometer  = DELTA2_NMR

Field strength = 9.389766[T] (400[MHz])
X_acq_duration = 1.04333312[s]
X_domain       = 13C
X_freq         = 100.52530333[MHz]
X_offset       = 100[ppm]
X_points       = 32768
X_prescans     = 4
X_resolution   = 0.95846665[Hz]
X_sweep        = 31.40703518[kHz]
Irr_domain     = 1H
Irr_freq       = 399.78219838[MHz]
Irr_offset     = 5[ppm]
Clipped        = TRUE
Mod_return     = 1
Scans          = 1800
Total_scans    = 1800

X_90_width     = 8.4[us]
X_acq_time     = 1.04333312[s]
X_angle        = 45[deg]
X_atn          = 6.6[db]
X_pulse        = 4.2[us]
Irr_atn_dec   = 22.2[db]
Irr_atn_noe   = 22.2[db]
Irr_noise      = WAITZ
Decoupling     = TRUE
Initial_wait   = 1[s]
Noe            = TRUE
Noe_time       = 2[s]
Recvr_gain     = 58
Relaxation_delay = 2[s]
Repetition_time = 3.04333312[s]
Temp_get       = 24.4[dc]

```

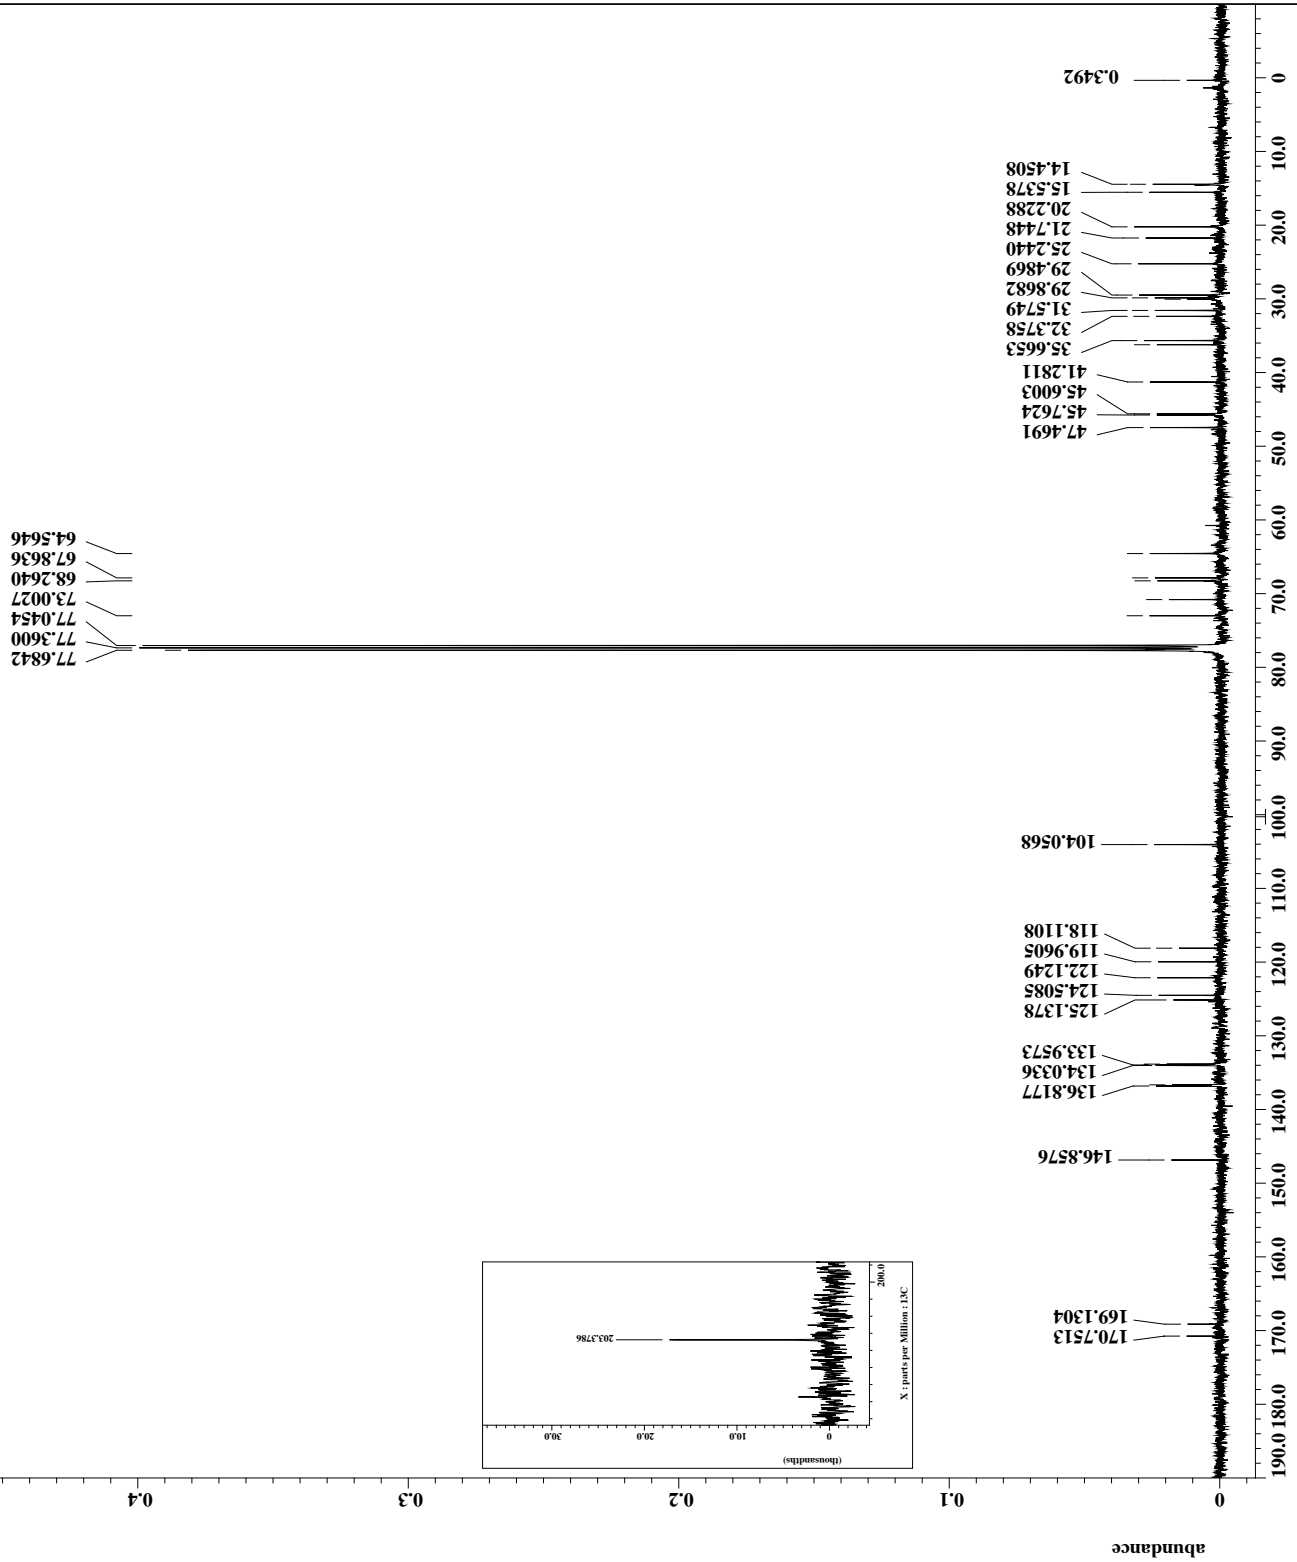

X : parts per Million : 13C

2: C33-peridinin derivative



```

Filename = C35derivative-1H-3.jd
Author = delta
Experiment = single_pulse.ex2
Sample_id = 1
Solvent = CHLOROFORM-D
Creation_time = 17-FEB-2008 05:21:58
Revision_time = 24-AUG-2009 10:53:52
Current_time = 24-AUG-2009 10:54:31

Comment = single_pulse
Data_format = ID COMPLEX
Dim_size = 26214
Dim_title = 1H
Dim_units = [ppm]
Dimensions = X
Site = ECX400M
Spectrometer = DELTA2_NMR

Field_strength = 9.389766[T] (400[MHz])
X_acq_duration = 4.36731904[s]
X_domain = 1H
X_freq = 399.78219838[MHz]
X_offset = 4[ppm]
X_points = 32768
X_prescans = 1
X_resolution = 0.22897343[Hz]
X_sweep = 7.5030012[KHz]
Irr_domain = 1H
Irr_freq = 399.78219838[MHz]
Irr_offset = 5[ppm]
Irr_domain = 1H
Tri_freq = 399.78219838[MHz]
Tri_offset = 5[ppm]
Clipped = FALSE
Mod_return = 1
Scans = 8
Total_scans = 8

X_90_width = 11.2[us]
X_acq_time = 4.36731904[s]
X_angle = 45[deg]
X_atn = 2.8[dB]
X_pulse = 5.6[us]
Irr_mode = Off
Tri_mode = Off
Dante_presat = FALSE
Initial_wait = 1[s]
Recvr_gain = 36
Relaxation_delay = 5[s]
Repetition_time = 9.36731904[s]
Temp_get = 23.2[dC]

```

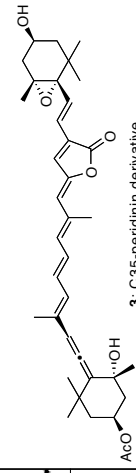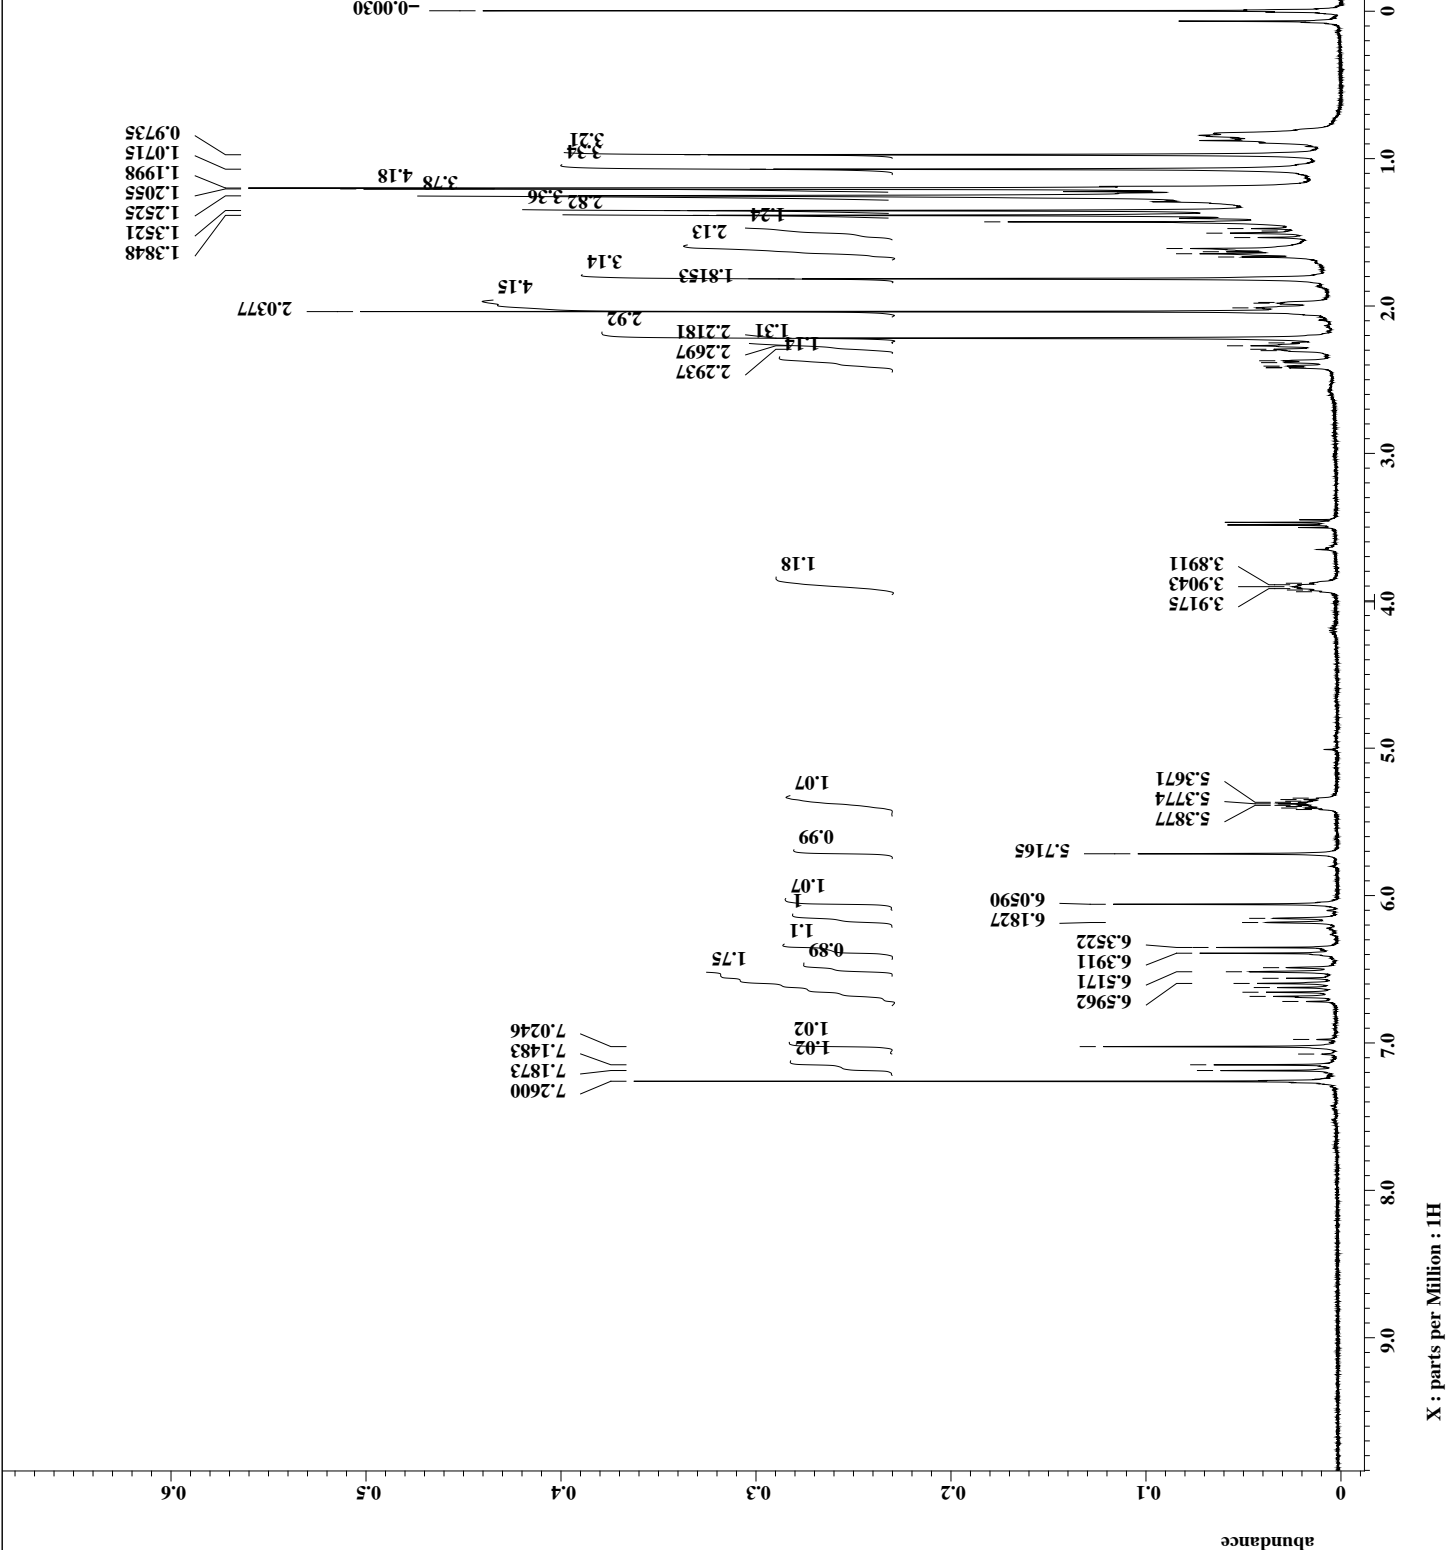

```

Filename = C35derivative-13C-2.j
Author = delta
Experiment = single_pulse_dec
Sample_id = 1
Solvent = CHLOROFORM-D
Creation_time = 16-FEB-2008 23:26:37
Revision_time = 24-AUG-2009 10:37:51
Current_time = 24-AUG-2009 10:40:32

Comment = single pulse decouple
Data_format = ID COMPLEX
Dim_size = 26214
Dim_title = 13C
Dim_units = [ppm]
Dimensions = X
Site = ECX400M
Spectrometer = DELTA2_NMR

Field_strength = 9.389766[T] (400[MHz])
X_acq_duration = 1.04333312[s]
X_domain = 13C
X_freq = 100.52530333[MHz]
X_offset = 100[ppm]
X_points = 32768
X_prescans = 4
X_resolution = 0.95846665[Hz]
X_sweep = 31.40703518[kHz]
Irr_domain = 1H
Irr_freq = 399.78219838[MHz]
Irr_offset = 5[ppm]
Clipped = FALSE
Mod_return = 1
Scans = 2000
Total_scans = 2000

X_90_width = 9.6[us]
X_acq_time = 1.04333312[s]
X_angle = 45[deg]
X_atn = 7.8[dB]
X_pulse = 4.8[us]
Irr_atn_dec = 21.4[dB]
Irr_atn_noe = 21.4[dB]
Irr_noise = WALTZ
Decoupling = TRUE
Initial_wait = 1[s]
Noe = TRUE
Noe_time = 2[s]
Recvr_gain = 56
Relaxation_delay = 2[s]
Repetition_time = 3.04333312[s]
Temp_get = 22.9[dc]

```

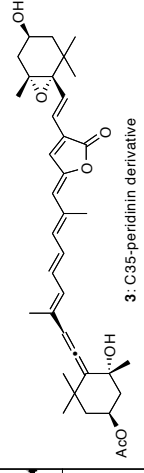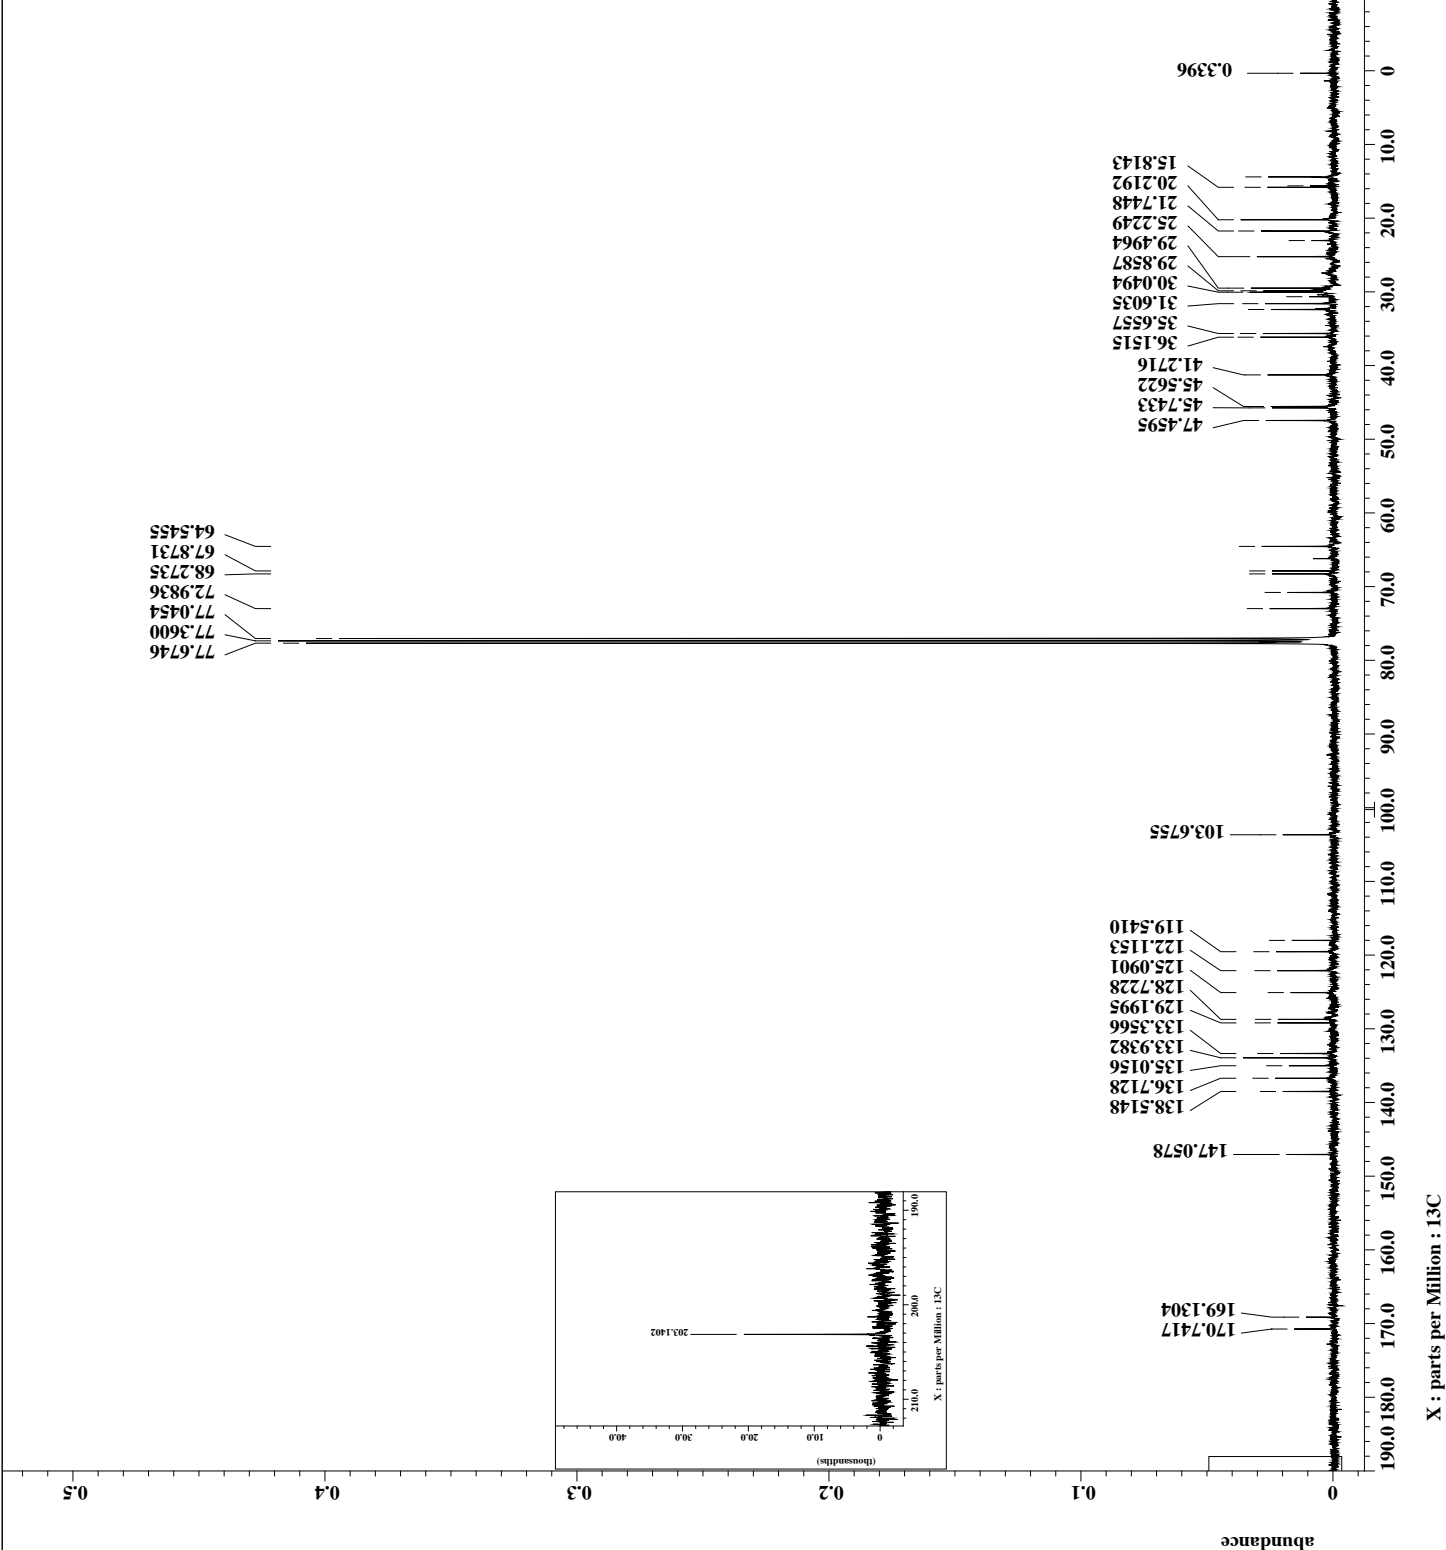

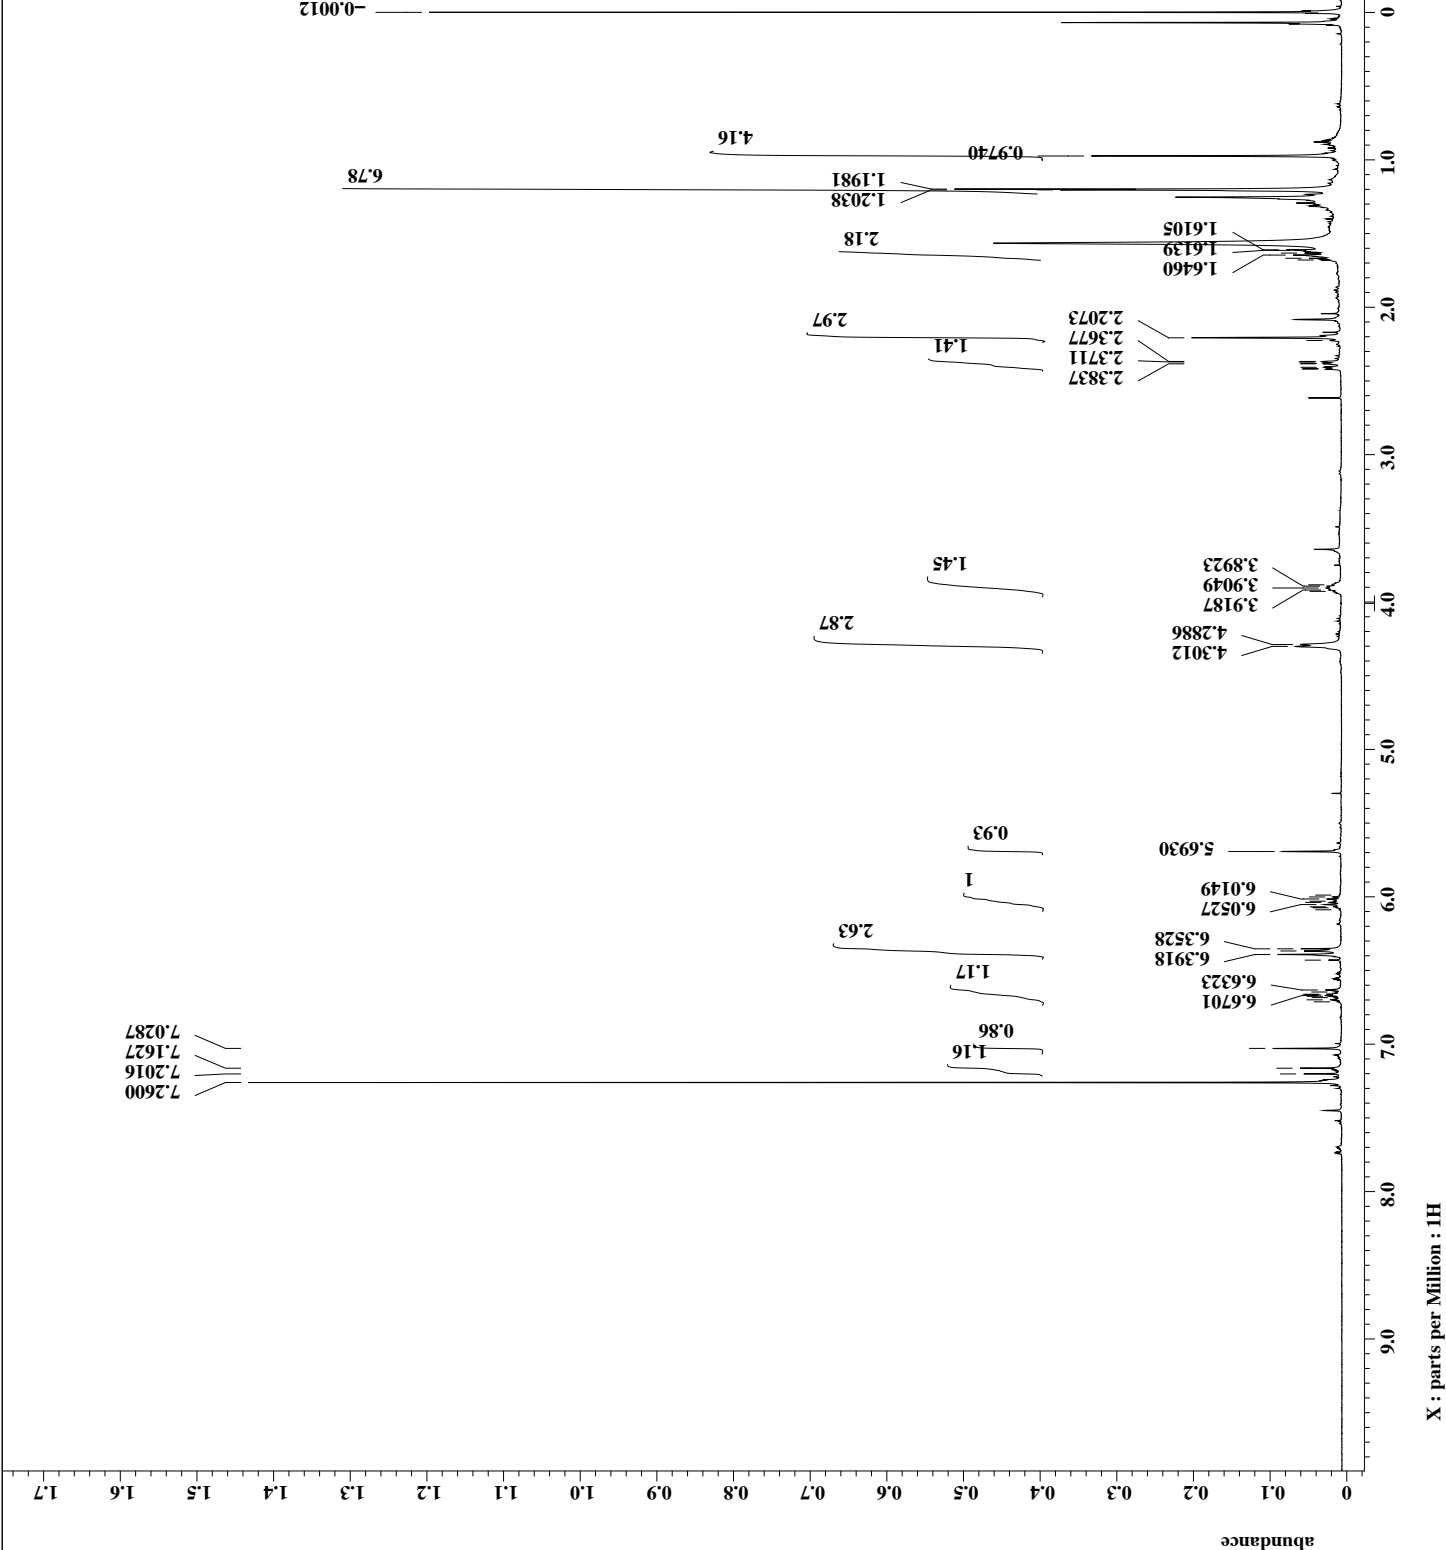

Filename = C22\_ylliden 1H-6.jdf  
 Author = delta  
 Experiment = single\_pulse.ex2  
 Sample\_id = 1  
 Solvent = CHLOROFORM-D  
 Creation\_time = 23-MAY-2009 12:05:03  
 Revision\_time = 24-AUG-2009 10:34:53  
 Current\_time = 24-AUG-2009 10:35:43  
 Comment = single\_pulse  
 Data\_format = ID COMPLEX  
 Dim\_size = 13107  
 Dim\_title = 1H  
 Dim\_units = [ppm]  
 Dimensions = X  
 Site = ECX400M  
 Spectrometer = DELTA2\_NMR

Field\_strength = 9.389766[T] (400[MHz])  
 x\_acq\_duration = 2.18365952[s]  
 x\_domain = 1H  
 x\_freq = 399.78219838[MHz]  
 x\_offset = 4[ppm]  
 x\_points = 16384  
 x\_prescans = 1  
 x\_resolution = 0.45794685[Hz]  
 x\_sweep = 7.5030012[KHz]  
 Irr\_domain = 1H  
 Irr\_freq = 399.78219838[MHz]  
 Irr\_offset = 5[ppm]  
 Tri\_domain = 1H  
 Tri\_freq = 399.78219838[MHz]  
 Tri\_offset = 5[ppm]  
 Clipped = FALSE  
 Mod\_return = 1  
 Scans = 200  
 Total\_scans = 200

x\_90\_width = 10.5[us]  
 x\_acq\_time = 2.18365952[s]  
 x\_angle = 45[deg]  
 x\_atn = 1.4[dB]  
 x\_pulse = 5.25[us]  
 Irr\_mode = Off  
 Tri\_mode = Off  
 Dante\_presat = FALSE  
 Initial\_wait = 1[s]  
 Recvr\_gain = 40  
 Relaxation\_delay = 1[s]  
 Repetition\_time = 3.18365952[s]  
 Temp\_get = 26.1[degC]

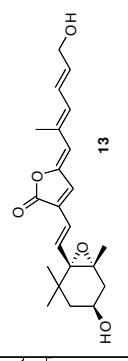

```

File Name      = C22_yllidenbutnolide-1
Author        = delta
Experiment    = single_pulse_dec
Sample ID     = S#556336
Solvent       = CHLOROFORM-D
Creation Time = 29-SEP-2008 15:44:07
Revision Time = 24-AUG-2009 11:39:16
Current Time  = 24-AUG-2009 11:39:57

Comment       = single pulse decouple
Data Format    = ID COMPLEX
Dim Size      = 26214
Dim Title     = 13C
Dim Units     = [ppm]
Dimensions    = X
Site          = ECX400M
Spectrometer  = DELTA2_NMR

Field Strength = 9.389766[T] (400[MHz])
X_acq_duration = 1.04333312[s]
X_domain       = 13C
X_freq         = 100.52530333[MHz]
X_offset       = 100[ppm]
X_points       = 32768
X_prescans     = 4
X_resolution   = 0.95846665[Hz]
X_sweep        = 31.40703518[kHz]
Irr_domain     = 1H
Irr_freq       = 399.78219838[MHz]
Irr_offset     = 5[ppm]
Clipped        = FALSE
Mod_return     = 1
Scans          = 1200
Total_scans    = 1200

X_90_width     = 9.2[us]
X_acq_time     = 1.04333312[s]
X_angle        = 45[deg]
X_atn          = 6.6[db]
X_pulse        = 4.6[us]
Irr_atn_dec    = 22.2[db]
Irr_atn_noe    = 22.2[db]
Irr_noise      = WAITZ
Decoupling     = TRUE
Initial_wait   = 1[s]
Noe            = TRUE
Noe_time       = 2[s]
Recvr_gain     = 54
Relaxation_delay = 2[s]
Repetition_time = 3.04333312[s]
Temp_get       = 25.6[dc]

```

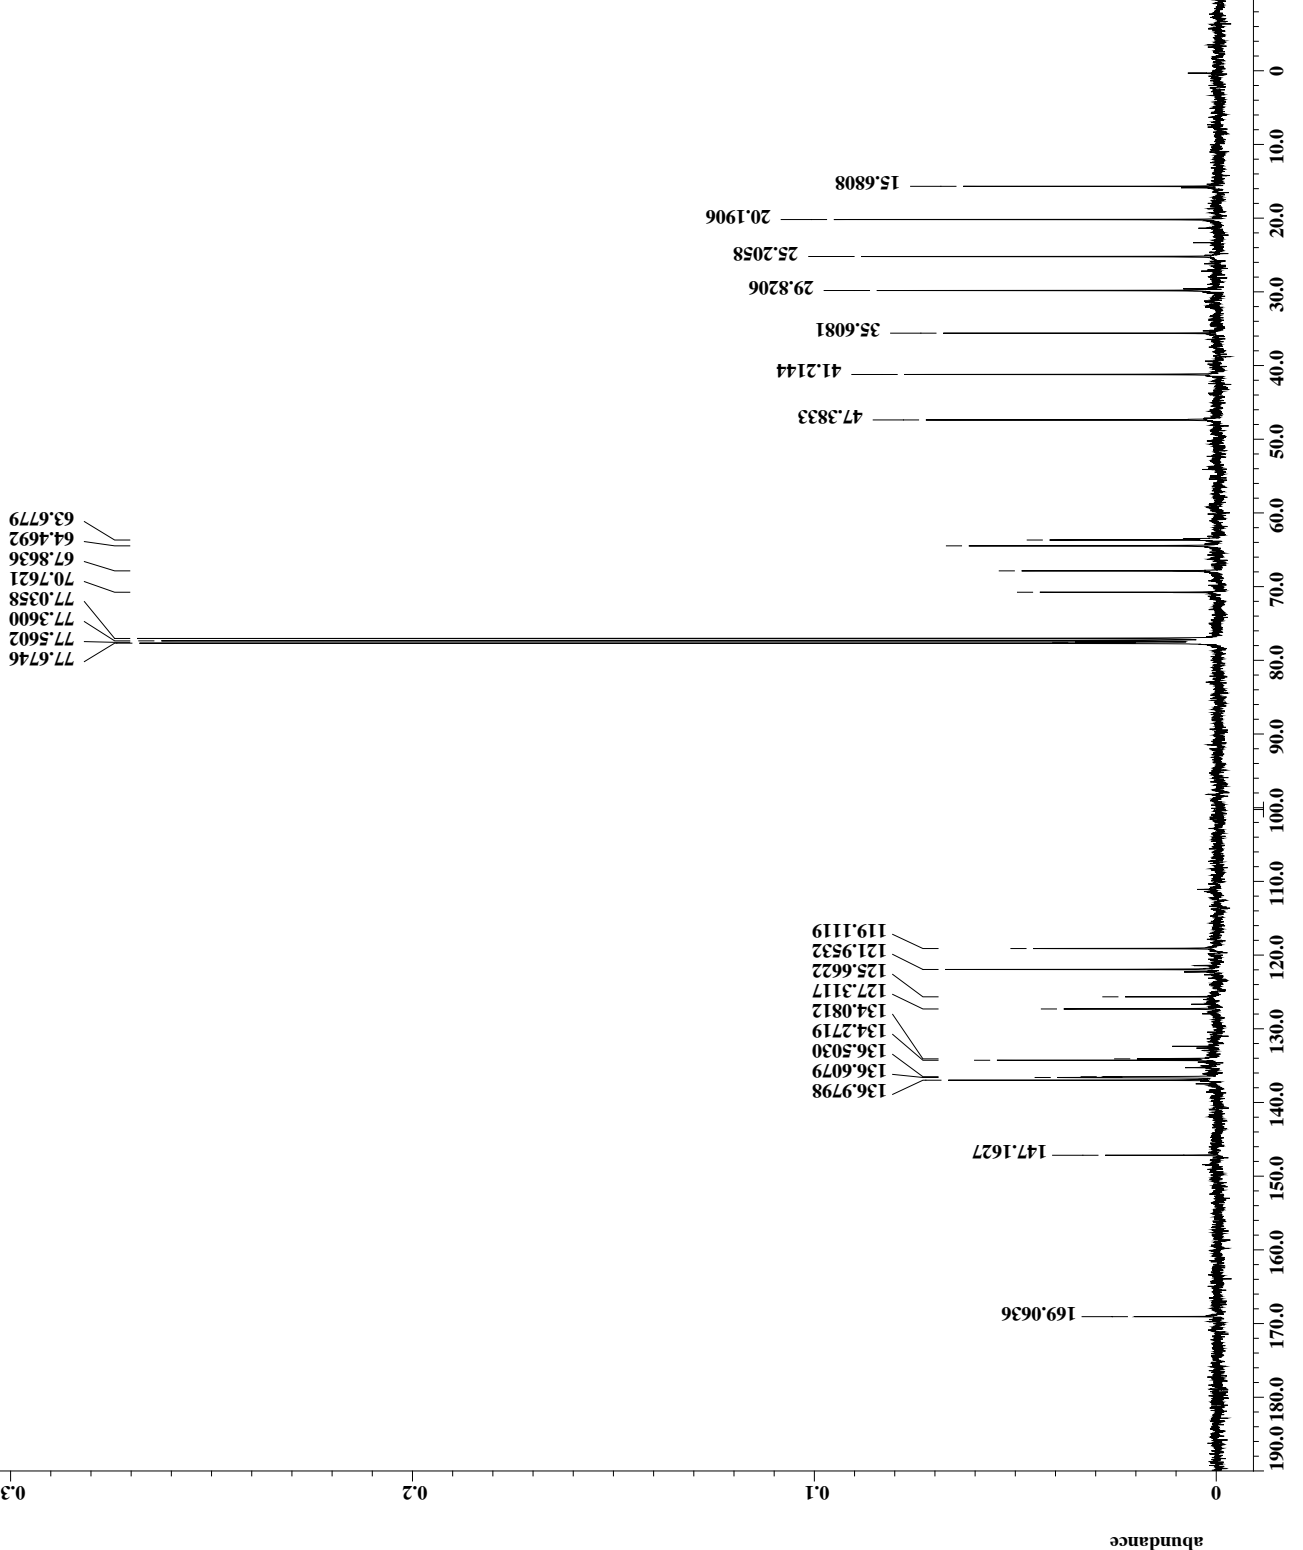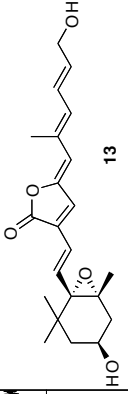

X : parts per Million : 13C
